# Supplementary material for: Biological Oxidations and Nitrations Promoted by the Hemin–Aβ16 Complex
Source: MDPI journal article supplement (doi:10.3390/antiox12071319), 2023-06-21
Supplement: s1 [file s1]

# Biological oxidations and nitrations promoted by hemin- $A\beta_{16}$ complex

Silvia De Caro<sup>1,2</sup>, Giulia De Soricellis<sup>1</sup>, Simone Dell'Acqua<sup>1</sup>, Enrico Monzani<sup>1,\*</sup> and Stefania Nicolis<sup>1,\*</sup>

<sup>1</sup> Dipartimento di Chimica, Università di Pavia, via Taramelli 12, 27100 Pavia, Italy; silvia.decaro01@universitadipavia.it (S.D.C.); giulia.desoricellis@unipv.it (G.D.S.); simone.dellacqua@unipv.it (S.D.); enrico.monzani@unipv.it (E.M.); stefania.nicolis@unipv.it (S.N.)

<sup>2</sup> Scuola Universitaria Superiore IUSS, piazza della Vittoria 15, 27100 Pavia, Italy

\* Correspondence: enrico.monzani@unipv.it (E.M.); stefania.nicolis@unipv.it (S.N.)

## Supporting information

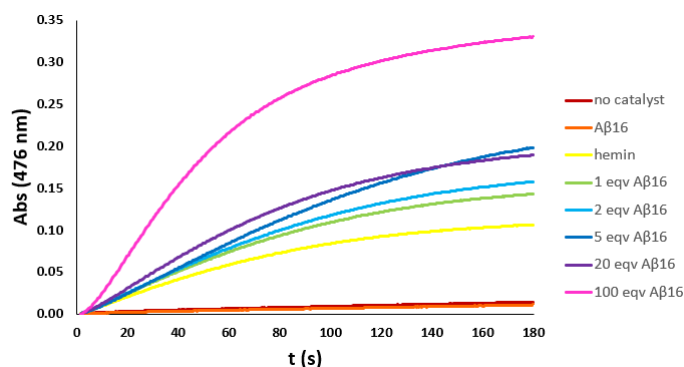

Figure S1: *kinetic trends of DA (3 mM) oxidation with  $H_2O_2$  (50 mM) in phosphate buffer (100 mM, pH 7.4) at 25°C, with no catalyst (brown trace) and in the presence of hemin (0.2  $\mu$ M) (yellow trace),  $A\beta_{16}$  (0.2  $\mu$ M) (orange trace) or hemin- $A\beta_{16}$  complex with increasing amounts of  $A\beta_{16}$  (1 eqv green trace, 2 eqv light blue trace, 5 eqv blue trace, 20 eqv purple trace, 100 eqv pink trace). Both the trends with no catalyst and in presence of the peptide only are almost flat, indicating no activity.*

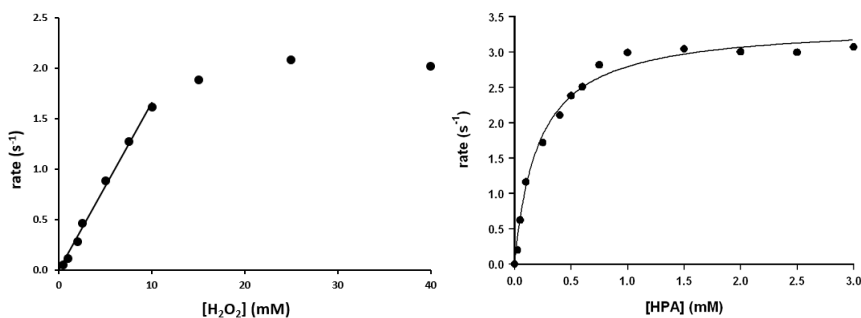

Figure S2: *trend of the initial rate of the oxidation reaction of the substrate HPA, in presence of  $A\beta_{16}$  10  $\mu$ M and hemin 2  $\mu$ M, vs  $[H_2O_2]$  (left) and vs  $[HPA]$  (right), in phosphate buffer 100 mM, pH 7.4 at 25°C.*

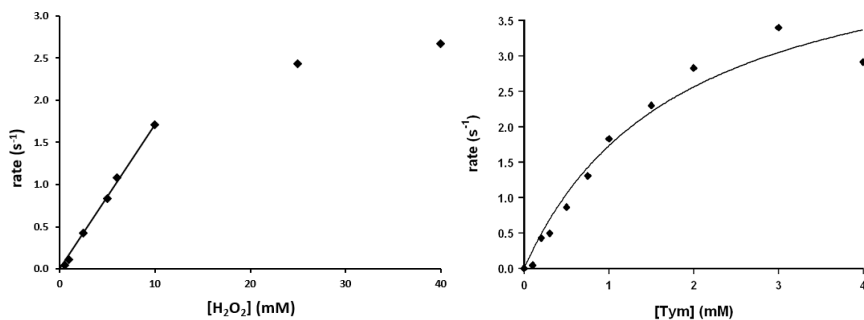

Figure S3: trend of the initial rate of the oxidation reaction of the substrate *Tym*, in presence of  $A\beta_{16}$  10  $\mu$ M and hemin 2  $\mu$ M, vs  $[H_2O_2]$  (left) and vs  $[Tym]$  (right), in phosphate buffer 100 mM, pH 7.4 at 25 °C.

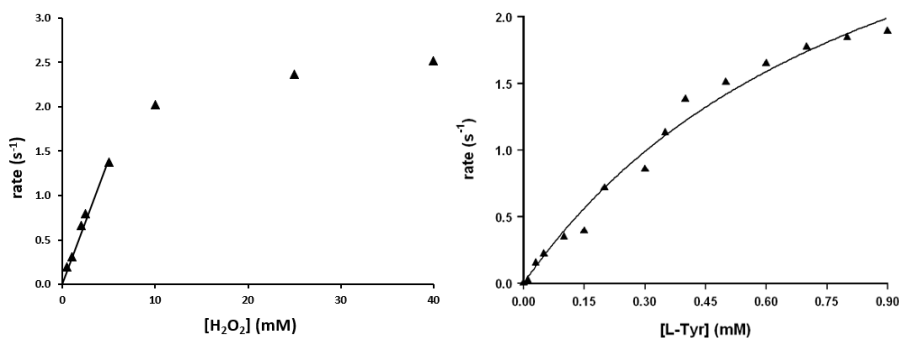

Figure S4: trend of the initial rate of the oxidation reaction of the substrate *L-Tyr*, in presence of  $A\beta_{16}$  10  $\mu$ M and hemin 2  $\mu$ M, vs  $[H_2O_2]$  (left) and vs  $[L-Tyr]$  (right), in phosphate buffer 100 mM, pH 7.4 at 25 °C.

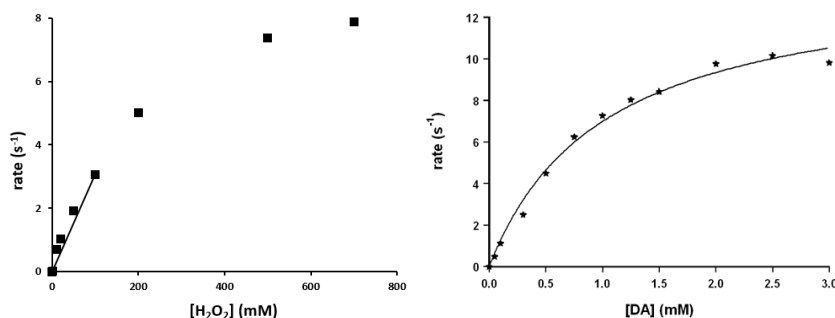

Figure S5: trend of the initial rate of the oxidation reaction of the substrate *DA*, in presence of  $A\beta_{16}$  1  $\mu$ M and hemin 0.2  $\mu$ M, vs  $[H_2O_2]$  (left) and vs  $[DA]$  (right), in phosphate buffer 100 mM, pH 7.4 at 25 °C.

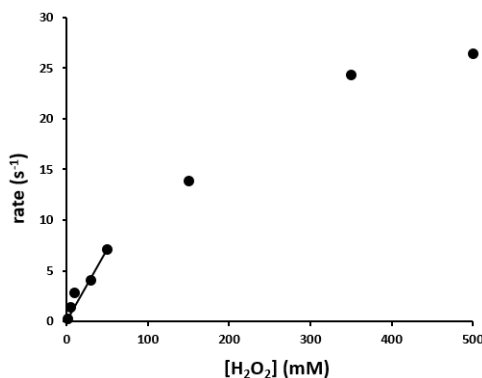

Figure S6: trend of the initial rate of the oxidation reaction of the substrate *L-DOPA*, in presence of  $A\beta_{16}$  1  $\mu$ M and hemin 0.2  $\mu$ M, vs  $[H_2O_2]$ , in phosphate buffer 100 mM, pH 7.4 at 25 °C.

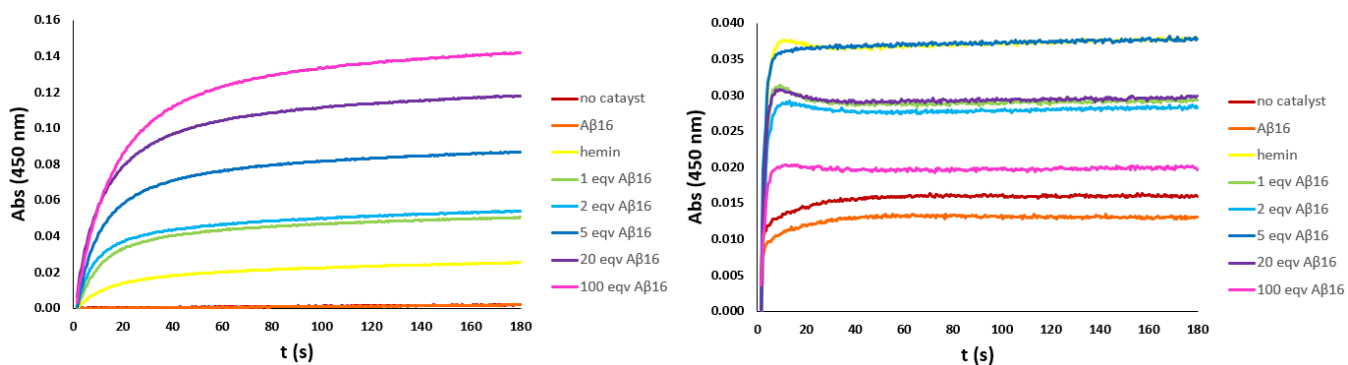

Figure S7: kinetic trends of HPA (3 mM) nitration with  $H_2O_2$  (50 mM) and  $NO_2^-$  (500 mM) (left) and with  $ONOO^-$  (0.1 mM) (right) in phosphate buffer (100 mM, pH 7.4) at 25°C, with no catalyst (brown trace) and in the presence of hemin (2  $\mu$ M) (yellow trace),  $A\beta_{16}$  (2  $\mu$ M) (orange trace) or hemin- $A\beta_{16}$  complex with increasing amounts of  $A\beta_{16}$  (1 eqv green trace, 2 eqv light blue trace, 5 eqv blue trace, 20 eqv purple trace, 100 eqv pink trace).

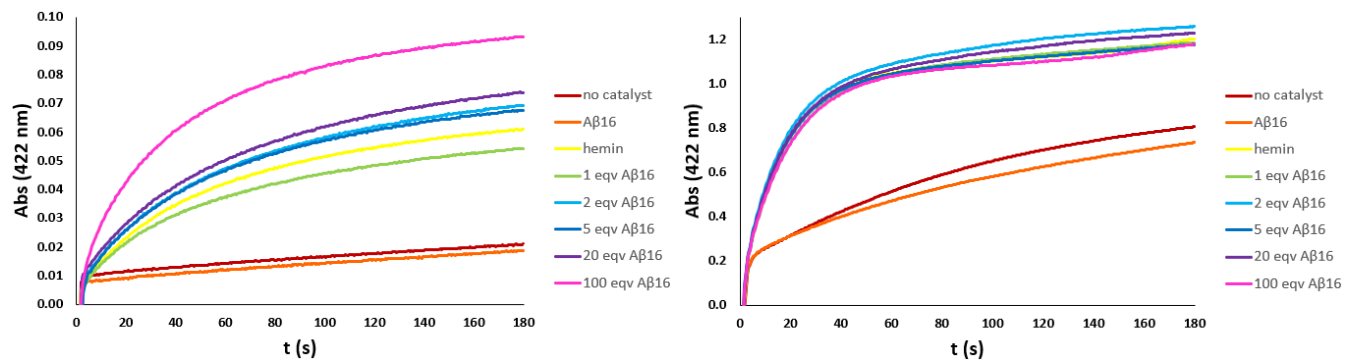

Figure S8: kinetic trends of DA (3 mM) nitration with  $H_2O_2$  (500 mM) and  $NO_2^-$  (500 mM) (left) and with  $ONOO^-$  (1 mM) (right) in phosphate buffer (100 mM, pH 7.4) at 25°C, with no catalyst (brown trace) and in the presence of hemin (0.2  $\mu$ M) (yellow trace),  $A\beta_{16}$  (0.2  $\mu$ M) (orange trace) or hemin- $A\beta_{16}$  complex with increasing amounts of  $A\beta_{16}$  (1 eqv green trace, 2 eqv light blue trace, 5 eqv blue trace, 20 eqv purple trace, 100 eqv pink trace).

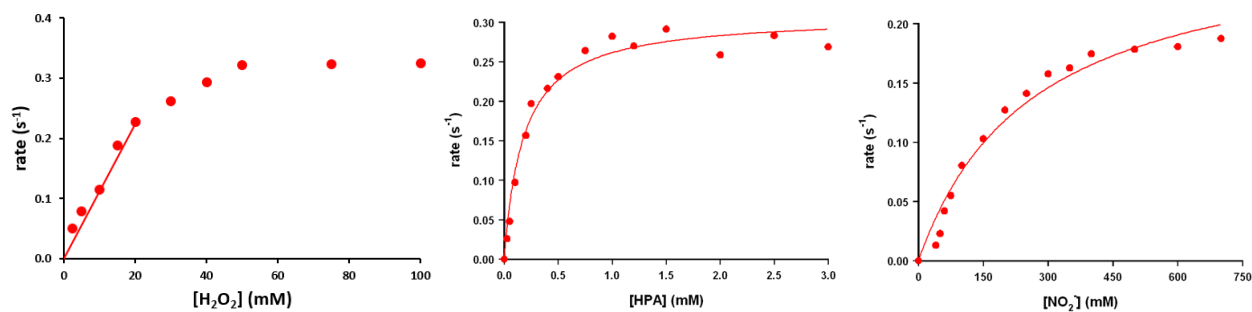

Figure S9: trend of the initial rate of the nitration reaction with  $H_2O_2/NO_2^-$  of the substrate HPA, in presence of  $A\beta_{16}$  10  $\mu$ M and hemin 2  $\mu$ M, vs  $[H_2O_2]$  (left), vs  $[HPA]$  (middle) and vs  $[NO_2^-]$  (right), in phosphate buffer 100 mM, pH 7.4 at 25°C.

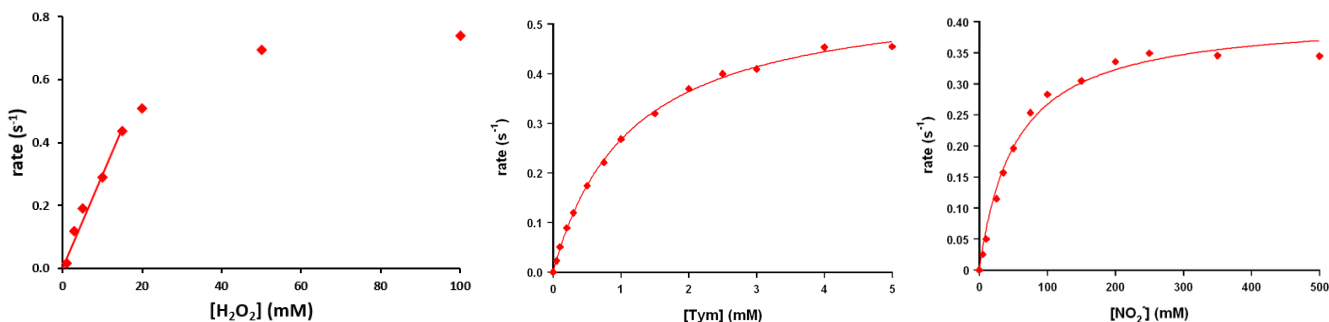

Figure S10: trend of the initial rate of the nitration reaction with  $H_2O_2/NO_2^-$  of the substrate Tym, in presence of  $A\beta_{16}$  10  $\mu M$  and hemin 2  $\mu M$ , vs  $[H_2O_2]$  (left), vs  $[Tym]$  (middle) and vs  $[NO_2^-]$  (right), in phosphate buffer 100 mM, pH 7.4 at 25  $^{\circ}C$ .

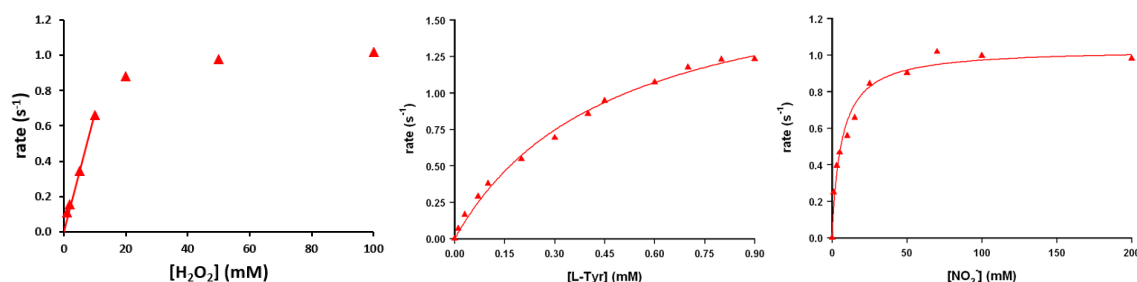

Figure S11: trend of the initial rate of the nitration reaction with  $H_2O_2/NO_2^-$  of the substrate L-Tyr, in presence of  $A\beta_{16}$  10  $\mu M$  and hemin 2  $\mu M$ , vs  $[H_2O_2]$  (left), vs  $[L-Tyr]$  (middle) and vs  $[NO_2^-]$  (right), in phosphate buffer 100 mM, pH 7.4 at 25  $^{\circ}C$ .

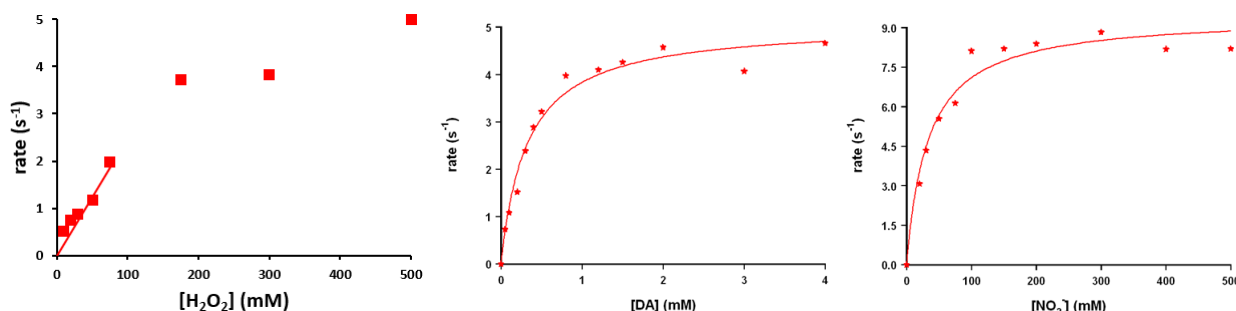

Figure S12: trend of the initial rate of the nitration reaction with  $H_2O_2/NO_2^-$  of the substrate DA, in presence of  $A\beta_{16}$  1  $\mu M$  and hemin 0.2  $\mu M$ , vs  $[H_2O_2]$  (left), vs  $[DA]$  (middle) and vs  $[NO_2^-]$  (right), in phosphate buffer 100 mM, pH 7.4 at 25  $^{\circ}C$ .

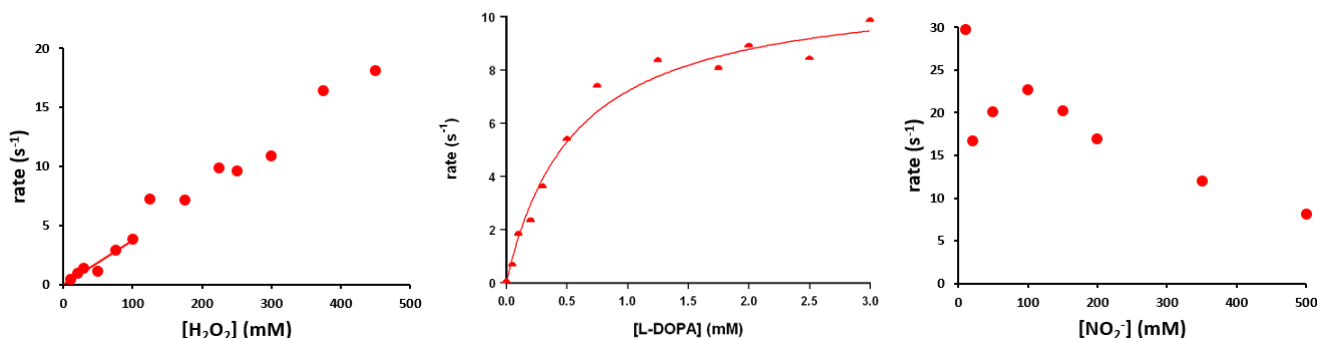

Figure S13: trend of the initial rate of the nitration reaction with  $H_2O_2/NO_2^-$  of the substrate L-DOPA, in presence of  $A\beta_{16}$  1  $\mu M$  and hemin 0.2  $\mu M$ , vs  $[H_2O_2]$  (left), vs  $[L-DOPA]$  (middle) and vs  $[NO_2^-]$  (right), in phosphate buffer 100 mM, pH 7.4 at 25  $^{\circ}C$ .

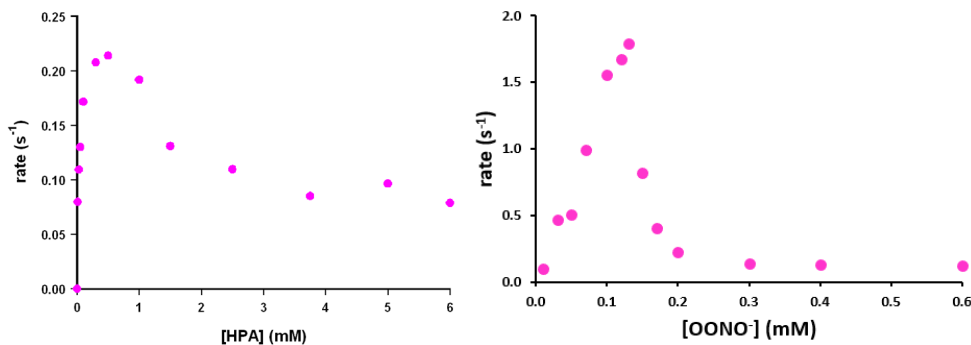

Figure S14: trend of the initial rate of the nitration reaction with  $ONOO^-$  of the substrate HPA, in presence of  $A\beta_{16}$  10  $\mu M$  and hemin 2  $\mu M$ , vs [HPA] (left) and vs  $[ONOO^-]$  (right), in phosphate buffer 100 mM, pH 7.4 at 25 °C.

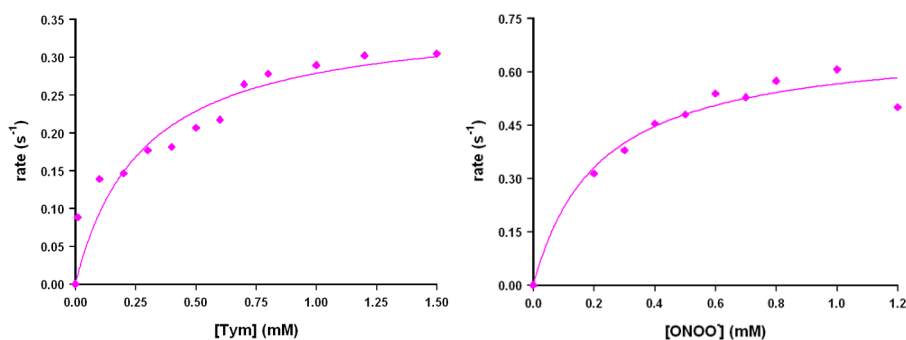

Figure S15: trend of the initial rate of the nitration reaction with  $ONOO^-$  of the substrate Tym, in presence of  $A\beta_{16}$  10  $\mu M$  and hemin 2  $\mu M$ , vs [Tym] (left) and vs  $[ONOO^-]$  (right), in phosphate buffer 100 mM, pH 7.4 at 25 °C.

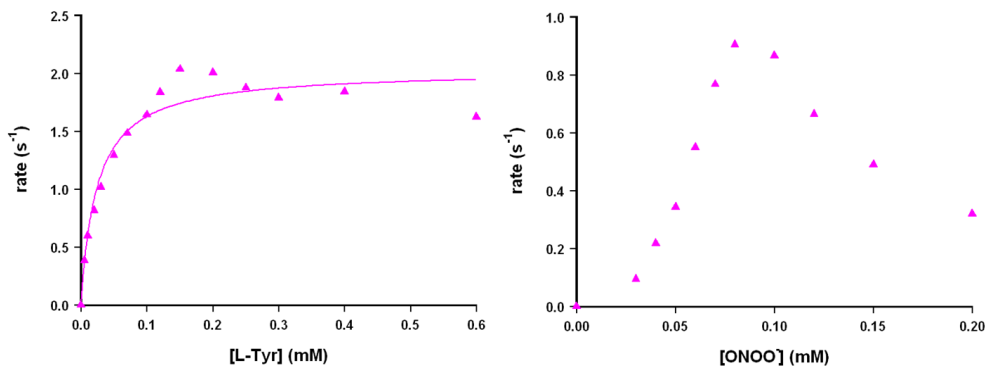

Figure S16: trend of the initial rate of the nitration reaction with  $ONOO^-$  of the substrate L-Tyr, in presence of  $A\beta_{16}$  10  $\mu M$  and hemin 2  $\mu M$ , vs [L-Tyr] (left) and vs  $[ONOO^-]$  (right), in phosphate buffer 100 mM, pH 7.4 at 25 °C.

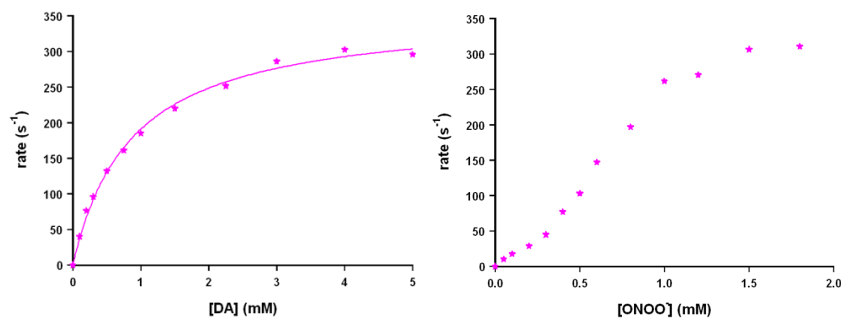

Figure S17: trend of the initial rate of the nitration reaction with  $ONOO^-$  of the substrate DA, in presence of  $A\beta_{16}$  1  $\mu M$  and hemin 0.2  $\mu M$ , vs [DA] (left) and vs  $[ONOO^-]$  (right), in phosphate buffer 100 mM, pH 7.4 at 25 °C.

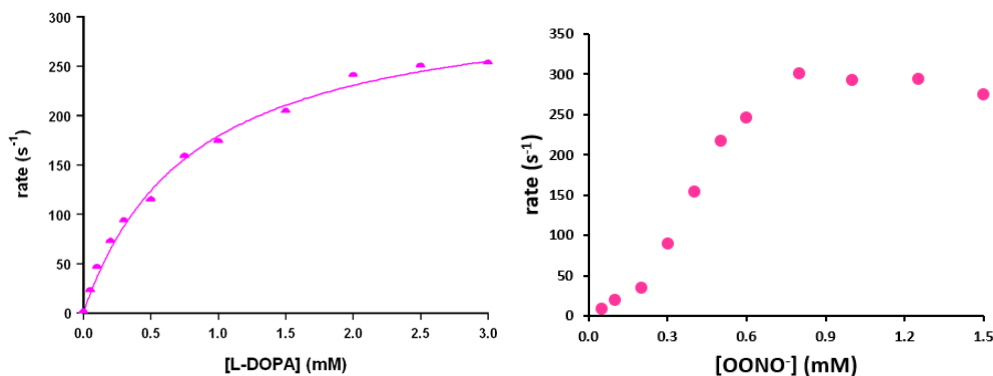

Figure S18: trend of the initial rate of the nitration reaction with  $\text{ONOO}^-$  of the substrate *L*-DOPA, in presence of  $\text{A}\beta_{16}$   $1\ \mu\text{M}$  and hemin  $0.2\ \mu\text{M}$ , vs  $[\text{L-DOPA}]$  (left) and vs  $[\text{ONOO}^-]$  (right), in phosphate buffer  $100\ \text{mM}$ , pH  $7.4$  at  $25^\circ\text{C}$ .

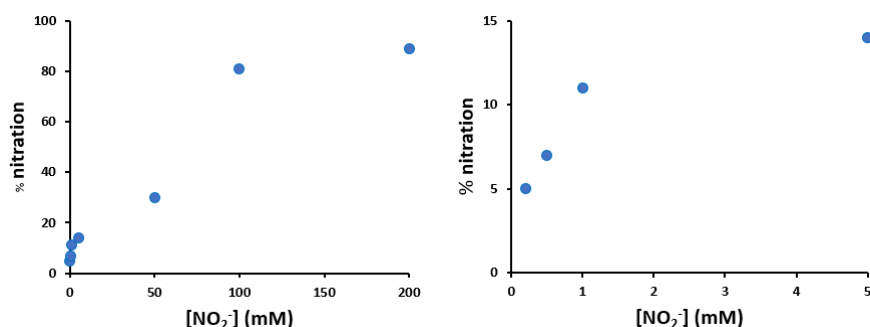

Figure S19: variation of the nitration percentage of the peptide ( $10\ \mu\text{M}$ ), in the presence of hemin ( $2\ \mu\text{M}$ ), as a function of the concentration of nitrite and hydrogen peroxide (both varying from  $0.2$  to  $200\ \text{mM}$ ), in phosphate buffer  $100\ \text{mM}$ , pH  $7.4$  after  $30\ \text{min}$  incubation at  $37^\circ\text{C}$  (left), and magnification of the results at low concentrations (right).

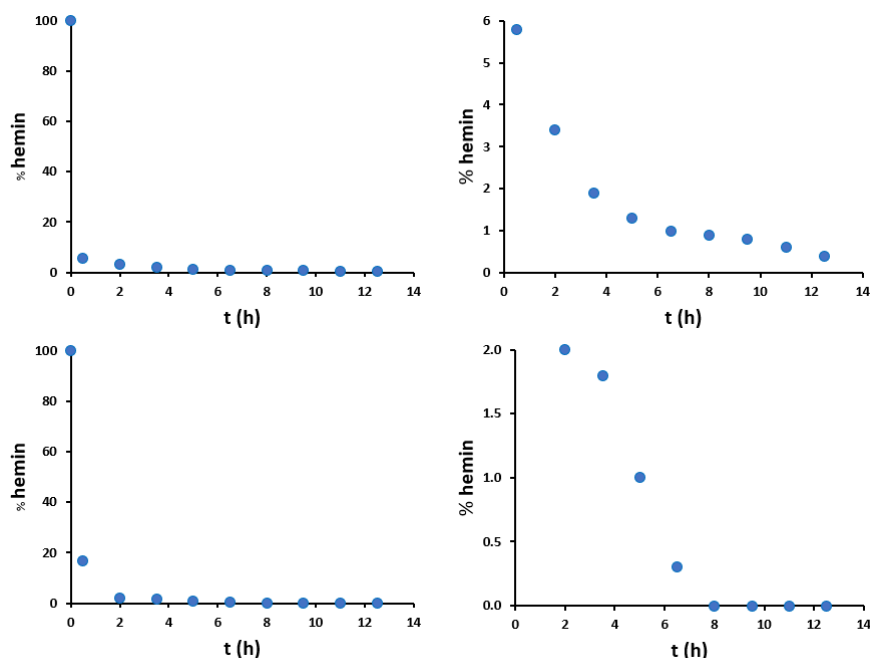

Figure S20: percentage amount of unmodified hemin as compared to the blank sample without hydrogen peroxide, in the presence of peptide ( $100\ \mu\text{M}$ ) and hemin ( $20\ \mu\text{M}$ ), in mild ( $200\ \mu\text{M}\ \text{H}_2\text{O}_2$  /  $200\ \mu\text{M}\ \text{NO}_2^-$ ) (up) and harsh ( $20\ \text{mM}\ \text{H}_2\text{O}_2$  /  $200\ \text{mM}\ \text{NO}_2^-$ ) (down) conditions. On the right, magnifications of the same experimental data with reduced y-axis in the range of  $0$ - $6\%$  hemin and  $0$ - $2\%$  hemin for mild (up) and harsh (down) conditions, respectively, are shown.
